# Supplementary material for: Use of ionizing radiation in a Norwegian cohort of children with congenital heart disease: imaging frequency and radiation dose for the Health Effects of Cardiac Fluoroscopy and Modern Radiotherapy in Pediatrics (HARMONIC) study
Source: Springer Nature journal article supplement (doi:10.1007/s00247-023-05774-8), 2023-09-29
Supplement: MOESM1 [file 26104202]

**Article title**

Use of ionizing radiation in a Norwegian cohort of children with congenital heart disease: Imaging frequency and radiation dose for the Health Effects of Cardiac Fluoroscopy and Modern Radiotherapy in Pediatrics (HARMONIC) study

**Journal name**

Pediatric Radiology

**Author names**

Susmita Afroz<sup>1,2\*</sup>, Bjørn H. Østerås<sup>3</sup>, Utheya S. Thevathas<sup>1,2</sup>, Gaute Dohlen<sup>2</sup>, Caroline Stokke<sup>3,4</sup>, Trude E. Robsahm<sup>5</sup>, Hilde M. Olerud<sup>1</sup>

**Affiliation**

<sup>1</sup>Department of Optometry, radiography and lighting design, University of South-Eastern Norway, Drammen, Norway,

<sup>2</sup>Department of pediatric cardiology, Oslo University Hospital, Oslo, Norway

<sup>3</sup>Department of Physics and Computational Radiology, Oslo University Hospital, Oslo, Norway

<sup>4</sup>Dep. Of Physics, University of Oslo, Oslo, Norway

<sup>5</sup> Research department, Cancer Registry of Norway, Oslo, Norway

**Email address of the corresponding author**

[Susmita.Afroz@usn.no](mailto:Susmita.Afroz@usn.no)

**Table S1.1** Record of machines and manufacturers for each modality used in Oslo University Hospital (OUS)

| Modality                 | Lab            | Time Period                                                | Machine                                                          | Manufacturer                               | Patients |
|--------------------------|----------------|------------------------------------------------------------|------------------------------------------------------------------|--------------------------------------------|----------|
| Conventional radiography | Lab 1          | Up to 2008                                                 | Philip Thoravision                                               | Philips Healthcare, Amsterdam, Netherlands | Adult    |
|                          |                | 2008 – present                                             | GE Definium 8000 <sup>a</sup>                                    | GE HealthCare, Chicago, IL                 |          |
|                          | Lab 2          | Up to 2016                                                 | Siemens Multix TOP (analogue)                                    | Siemens Healthineers, Erlangen, Germany    | Adult    |
|                          |                | 2016 – present                                             | Adora (Canon detectors)                                          | Canon Medical Systems, Tochigi, Japan      |          |
|                          | Lab 3          | Up to 2018                                                 | Siemens TOP Flat Panel                                           | Siemens Healthineers, Erlangen, Germany    | Adult    |
|                          |                | 2018 – present                                             | Siemens Ysio Max                                                 | Siemens Healthineers, Erlangen, Germany    |          |
|                          | Lab 4          | Up to 2020                                                 | G.E. Prestige transillumination and exposure with CR / Film/foil | GE HealthCare, Chicago, IL                 | Adult    |
|                          |                | 2020 – present                                             | Siemens Multitom RAX                                             | Siemens Healthineers, Erlangen, Germany    |          |
|                          | Lab 6          | Up to 2020                                                 | Siemens TOP Flat Panel                                           | Siemens Healthineers, Erlangen, Germany    | Adult    |
|                          |                | 2020 – present                                             | Siemens Ysio Max                                                 | Siemens Healthineers, Erlangen, Germany    |          |
|                          | Lab 7          | Up to 2019                                                 | Siemens TOP Flat Panel                                           | Siemens Healthineers, Erlangen, Germany    | Children |
| Lab 8                    | Up to 2018     | Philips diagnost 97 transillumination and exposure with CR | Philips Healthcare, Amsterdam, Netherlands                       | Children                                   |          |
|                          | 2018 – present | Siemens Artis Zee MP                                       | Siemens Healthineers, Erlangen, Germany                          | Children                                   |          |
| Lab 9                    | Up to 2019     | Philips MD 4 transillumination                             | Philips Healthcare, Amsterdam, Netherlands                       | Children                                   |          |
| Lab 11                   | 2005 – 2018    | Philips MD 4                                               | Philips Healthcare, Amsterdam, Netherlands                       | Children                                   |          |
|                          | 2018 – present | Siemens Artis Zee MP                                       | Siemens Healthineers, Erlangen, Germany                          |                                            |          |
| Mobile units             | 2000 – 2008    | Siemens Mobilett and Siemens polymobile                    | Siemens Healthineers, Erlangen, Germany                          | Children                                   |          |
|                          | 2008 – 2017    | Siemens Mobilett plus                                      | Siemens Healthineers, Erlangen, Germany                          |                                            |          |
|                          | 2016 – present | Carestream DRX revolution                                  | Carestream Health, Rochester, NY                                 |                                            |          |
| CT                       |                | 2000 – 2004                                                | GE HiSpeed single slice                                          | GE HealthCare, Chicago, IL                 | Children |
|                          |                | 2004 – 2006                                                | GE LightSpeed Pro 16 slice                                       | GE HealthCare, Chicago, IL                 |          |
|                          |                | 2006 – 2011                                                | GE VCT 64 slice                                                  | GE HealthCare, Chicago, IL                 |          |

|                        |                |                                                                      |                                         |          |
|------------------------|----------------|----------------------------------------------------------------------|-----------------------------------------|----------|
|                        | 2011 – 2017    | Toshiba Aquilion One 320 Slice                                       | Toshiba, Tokyo, Japan                   |          |
|                        | 2017 – present | Siemens Somatom Force Dual Source 2x 198 slice                       | Siemens Healthineers, Erlangen, Germany |          |
| Angio/<br>Intervention | 2000 – 2011    | Siemens Bicor with image intensifier                                 |                                         | Children |
|                        | 2011 – present | Siemens Artis Zee Biplane system with a digital flat panel detector. | Siemens Healthineers, Erlangen, Germany | Children |

<sup>a</sup>For thorax imaging

*CR* computed radiography, *CT* computed tomography
