# Supplementary material for: Use of ionizing radiation in a Norwegian cohort of children with congenital heart disease: imaging frequency and radiation dose for the Health Effects of Cardiac Fluoroscopy and Modern Radiotherapy in Pediatrics (HARMONIC) study
Source: Springer Nature journal article supplement (doi:10.1007/s00247-023-05774-8), 2023-09-29
Supplement: MOESM2 [file 26104202]

**Article title**

Use of ionizing radiation in a Norwegian cohort of children with congenital heart disease: Imaging frequency and radiation dose for the Health Effects of Cardiac Fluoroscopy and Modern Radiotherapy in Pediatrics (HARMONIC) study

**Journal name**

Pediatric Radiology

**Author names**

Susmita Afroz<sup>1,2\*</sup>, Bjørn H. Østerås<sup>3</sup>, Utheya S. Thevathas<sup>1,2</sup>, Gaute Dohlen<sup>2</sup>, Caroline Stokke<sup>3,4</sup>, Trude E. Robsahm<sup>5</sup>, Hilde M. Olerud<sup>1</sup>

**Affiliation**

<sup>1</sup>Department of Optometry, radiography and lighting design, University of South-Eastern Norway, Drammen, Norway,

<sup>2</sup>Department of pediatric cardiology, Oslo University Hospital, Oslo, Norway

<sup>3</sup>Department of Physics and Computational Radiology, Oslo University Hospital, Oslo, Norway

<sup>4</sup>Dep. Of Physics, University of Oslo, Oslo, Norway

<sup>5</sup> Research department, Cancer Registry of Norway, Oslo, Norway

**Email address of the corresponding author**

[Susmita.Afroz@usn.no](mailto:Susmita.Afroz@usn.no)

**Table S2.1** Record of dose area product (DAP) and effective dose values in common conventional radiography examinations stratified by body region for the Health Effects of Cardiac Fluoroscopy and Modern Radiotherapy in Pediatrics (HARMONIC) cohort of Norwegian patients with congenital heart disease

| Body region    | Age category                 | Number of examinations | Number of examinations with DAP | Median DAP (Gycm <sup>2</sup> ) | DAP IQR (Gycm <sup>2</sup> ) | Conversion factor: effective dose/DAP (mSv/Gycm <sup>2</sup> ) <sup>a</sup> | Median (IQR) effective dose (mSv) |
|----------------|------------------------------|------------------------|---------------------------------|---------------------------------|------------------------------|-----------------------------------------------------------------------------|-----------------------------------|
| Neck (AP/Lat)  | 0–3 m (newborn)              | 3                      | 1                               | 0.04                            | -                            | NA                                                                          | -                                 |
|                | 4–30 m (1 year)              | 16                     | 8                               | 0.02                            | 0.01–0.02                    | NA                                                                          | -                                 |
|                | 31–90 m (5 years)            | 29                     | 9                               | 0.03                            | 0.03–0.11                    | NA                                                                          | -                                 |
|                | 91–150 m (10 years)          | 20                     | 10                              | 0.12                            | 0.02–0.21                    | NA                                                                          | -                                 |
|                | 151–210 m (15 years)         | 11                     | 7                               | 0.08                            | 0.04–0.10                    | NA                                                                          | -                                 |
|                | 211–216 m (late adolescents) | 0                      | 0                               | -                               | -                            | NA                                                                          | -                                 |
| Thorax (AP/PA) | 0–3 m (newborn)              | 4,615                  | 428                             | 0.01                            | 0.004–0.01                   | 2.20                                                                        | 0.012 (0.01–0.02)                 |
|                | 4–30 m (1 year)              | 9,322                  | 2,376                           | 0.01                            | 0.01–0.02                    | 0.58                                                                        | 0.008 (0.005–0.01)                |
|                | 31–90 m (5 years)            | 6,567                  | 2,780                           | 0.02                            | 0.01–0.04                    | 0.41                                                                        | 0.008 (0.004–0.02)                |
|                | 91–150 m (10 years)          | 4,216                  | 1,910                           | 0.05                            | 0.03–0.07                    | 0.28                                                                        | 0.013 (0.01–0.02)                 |
|                | 151–210 m (15 years)         | 3,840                  | 1,323                           | 0.08                            | 0.06–0.12                    | 0.16                                                                        | 0.013 (0.01–0.02)                 |
|                | 211–216 m (late adolescents) | 177                    | 19                              | 0.13                            | 0.1–0.17                     | 0.15                                                                        | 0.020 (0.02–0.03)                 |
| Abdomen (AP)   | 0–3 m (newborn)              | 250                    | 22                              | 0.01                            | 0.01–0.01                    | 2.00                                                                        | 0.016 (0.01–0.03)                 |
|                | 4–30 m (1 year)              | 90                     | 28                              | 0.02                            | 0.01–0.04                    | 0.91                                                                        | 0.019 (0.012–0.04)                |
|                | 31–90 m (5 years)            | 56                     | 16                              | 0.04                            | 0.03–0.09                    | 0.64                                                                        | 0.026 (0.02–0.06)                 |
|                | 91–150 m (10 years)          | 55                     | 25                              | 0.05                            | 0.04–0.19                    | 0.40                                                                        | 0.021 (0.02–0.08)                 |
|                | 151–210 m (15 years)         | 43                     | 23                              | 0.80                            | 0.26–1.25                    | 0.28                                                                        | 0.224 (0.07–0.35)                 |
|                | 211–216 m (late adolescents) | 0                      | 0                               | -                               | -                            | 0.20                                                                        | -                                 |
| Pelvis (AP)    | 0–3 m (newborn)              | 10                     | 4                               | 0.01                            | 0.004–0.01                   | 2.20                                                                        | 0.013 (0.01–0.02)                 |
|                | 4–30 m (1 year)              | 27                     | 9                               | 0.01                            | 0.01–0.02                    | 1.10                                                                        | 0.012 (0.01–0.02)                 |
|                | 31–90 m (5 years)            | 30                     | 13                              | 0.03                            | 0.02–0.05                    | 0.60                                                                        | 0.020 (0.01–0.03)                 |
|                | 91–150 m (10 years)          | 43                     | 18                              | 0.11                            | 0.04–0.33                    | 0.28                                                                        | 0.029 (0.01–0.09)                 |
|                | 151–210 m (15 years)         | 62                     | 26                              | 0.19                            | 0.11–0.48                    | 0.21                                                                        | 0.039 (0.02–0.10)                 |
|                | 211–216 m (late adolescents) | 3                      | 3                               | 0.24                            | 0.22–0.65                    | 0.22                                                                        | 0.052 (0.05–0.14)                 |
| Limbs          | 0–3 m (newborn)              | 26                     | 2                               | 0.02                            | 0.02–0.02                    | NA                                                                          | -                                 |
|                | 4–30 m (1 year)              | 67                     | 18                              | 0.01                            | 0.003–0.01                   | NA                                                                          | -                                 |
|                | 31–90 m (5 years)            | 127                    | 46                              | 0.01                            | 0.002–0.02                   | NA                                                                          | -                                 |
|                | 91–150 m (10 years)          | 203                    | 94                              | 0.02                            | 0.004–0.04                   | NA                                                                          | -                                 |
|                | 151–210 m (15 years)         | 214                    | 113                             | 0.02                            | 0.01–0.07                    | NA                                                                          | -                                 |
|                | 211–216 m (late adolescents) | 17                     | 11                              | 0.05                            | 0.01–0.12                    | NA                                                                          | -                                 |
| Trunk (PA)     | 0–3 m (newborn)              | 3                      | 1                               | 0.04                            | -                            | NA                                                                          | -                                 |
|                | 4–30 m (1 year)              | 10                     | 5                               | 0.01                            | 0.004–0.02                   | NA                                                                          | -                                 |
|                | 31–90 m (5 years)            | 66                     | 29                              | 0.03                            | 0.01–0.06                    | NA                                                                          | -                                 |
|                | 91–150 m (10 years)          | 143                    | 83                              | 0.14                            | 0.07–0.26                    | NA                                                                          | -                                 |
|                | 151–210 m (15 years)         | 306                    | 172                             | 0.50                            | 0.28–0.75                    | NA                                                                          | -                                 |
|                | 211–216 m (late adolescents) | 15                     | 8                               | 0.40                            | 0.21–0.54                    | NA                                                                          | -                                 |

<sup>a</sup>Conversion factors from DAP to effective dose [27]

AP anterior to posterior DAP dose area product, IQR interquartile range, Lat Lateral, m months, NA not available,

PA posterior to anterior

**Table S2.2** Record of dose length product (DLP) and effective dose values in common computed tomography (CT) examinations stratified by body region for the Health Effects of Cardiac Fluoroscopy and Modern Radiotherapy in Pediatrics (HARMONIC) cohort of Norwegian patients with congenital heart disease

| Body region | Age category                 | Number of examinations | Number of examination with DAP | Median DLP (mGycm) | DLP IQR (mGycm) | Conversion factor: effective dose/ DLP (mSv/mGycm) <sup>a</sup> | Median (IQR) effective dose (mSv) |
|-------------|------------------------------|------------------------|--------------------------------|--------------------|-----------------|-----------------------------------------------------------------|-----------------------------------|
| CT head     | 0–3 m (newborn)              | 23                     | 5                              | 236.00             | 61–287          | 0.011                                                           | 2.59 (0.67–3.16)                  |
|             | 4–30 m (1 year)              | 64                     | 12                             | 384.45             | 339–497.71      | 0.007                                                           | 2.58 (2.27–3.33)                  |
|             | 31–90 m (5 years)            | 69                     | 33                             | 520.94             | 157.68–580.54   | 0.004                                                           | 2.08 (0.63–2.32)                  |
|             | 91–150 m (10 years)          | 76                     | 47                             | 557.26             | 123.89–715.29   | 0.003                                                           | 1.78 (0.39–2.29)                  |
|             | 151–210 m (15 years)         | 72                     | 40                             | 588.92             | 125.32–823.19   | 0.002                                                           | 1.24 (0.26–1.73)                  |
|             | 211–216 m (late adolescents) | 3                      | 1                              | 179.90             | -               | 0.002                                                           | 0.38(NA)                          |
| CT thorax   | 0–3 m (newborn)              | 58                     | 27                             | 61.04              | 43.1–65.65      | 0.039                                                           | 2.38 (1.68–2.56)                  |
|             | 4–30 m (1 year)              | 138                    | 51                             | 54.00              | 23–88.65        | 0.026                                                           | 1.40 (0.59–2.30)                  |
|             | 31–90 m (5 years)            | 104                    | 48                             | 42.30              | 25.81–69.73     | 0.018                                                           | 0.76 (0.46–1.26)                  |
|             | 91–150 m (10 years)          | 94                     | 44                             | 72.14              | 36.355–126.65   | 0.013                                                           | 0.94 (0.47–1.65)                  |
|             | 151–210 m (15 years)         | 75                     | 41                             | 169.65             | 58–248.15       | 0.014                                                           | 2.38 (0.81–3.47)                  |
|             | 211–216 m (late adolescents) | 6                      | 2                              | 247.5              | 154–341         | 0.014                                                           | 3.47 (2.16–4.77)                  |
| CT abdomen  | 0–3 m (newborn)              | 6                      | 1                              | 34.31              | -               | 0.049                                                           | 1.68 (NA)                         |
|             | 4–30 m (1 year)              | 9                      | 1                              | 157.00             | -               | 0.030                                                           | 4.71 (NA)                         |
|             | 31–90 m (5 years)            | 11                     | 7                              | 91.21              | 51–110.16       | 0.020                                                           | 1.82 (1.02–2.20)                  |
|             | 91–150 m (10 years)          | 21                     | 8                              | 149.73             | 127.09–184      | 0.015                                                           | 2.25 (1.91–2.76)                  |
|             | 151–210 m (15 years)         | 13                     | 7                              | 470.00             | 206.33–1075     | 0.015                                                           | 7.05 (3.09–16.13)                 |
|             | 211–216 m (late adolescents) | 0                      | 0                              | -                  | -               | 0.015                                                           | -                                 |

<sup>a</sup>Conversion factors from DLP to effective dose [28]

CT computed tomography, DLP dose length product, IQR interquartile range, m months, NA not available

**Table S2.3** Record of dose area product (DAP) and effective dose values in common diagnostic fluoroscopy examinations stratified by body region for the Health Effects of Cardiac Fluoroscopy and Modern Radiotherapy in Pediatrics (HARMONIC) cohort of Norwegian patients with congenital heart disease

| Body region                                    | Age category                 | Number of examinations | Number of examinations with DAP | Median DAP (Gycm <sup>2</sup> ) | DAP IQR (Gycm <sup>2</sup> ) | Median fluoro time (min) | Conversion factor: effective dose/DAP (mSv/Gycm <sup>2</sup> ) <sup>a</sup> | Median (IQR) effective dose (mSv) |
|------------------------------------------------|------------------------------|------------------------|---------------------------------|---------------------------------|------------------------------|--------------------------|-----------------------------------------------------------------------------|-----------------------------------|
| Gastrointestinal tract (neck + chest +abdomen) | 0–3 m (newborn)              | 91                     | 74                              | 0.15                            | 0.07–0.27                    | 3.3                      | 1.79 <sup>b</sup>                                                           | 0.27 (0.12–0.48)                  |
|                                                | 4–30 m (1 year)              | 197                    | 121                             | 0.30                            | 0.15–0.50                    | 2.8                      | 0.76 <sup>b</sup>                                                           | 0.23 (0.11–0.38)                  |
|                                                | 31–90 m (5 years)            | 83                     | 63                              | 0.44                            | 0.19–0.78                    | 2.4                      | 0.49 <sup>b</sup>                                                           | 0.22 (0.09–0.38)                  |
|                                                | 91–150 m (10 years)          | 32                     | 25                              | 0.54                            | 0.18–0.99                    | 2.8                      | 0.33 <sup>b</sup>                                                           | 0.18 (0.06–0.33)                  |
|                                                | 151–210 m (15 years)         | 23                     | 15                              | 0.77                            | 0.28–1.24                    | 2.1                      | 0.22 <sup>b</sup>                                                           | 0.17 (0.06–0.27)                  |
|                                                | 211–216 m (late adolescents) | 0                      | 0                               | -                               | -                            | -                        | 0.2 <sup>b</sup>                                                            | -                                 |
| Uro-genital tract                              | 0–3 m (newborn)              | 13                     | 9                               | 0.14                            | 0.07–0.20                    | 2.0                      | 1.28                                                                        | 0.18 (0.09–0.26)                  |
|                                                | 4–30 m (1 year)              | 30                     | 15                              | 0.34                            | 0.17–0.68                    | 2.1                      | 0.64                                                                        | 0.22 (0.11–0.44)                  |
|                                                | 31–90 m (5 years)            | 36                     | 15                              | 0.22                            | 0.19–0.48                    | 1.9                      | 0.46                                                                        | 0.10 (0.09–0.22)                  |
|                                                | 91–150 m (10 years)          | 51                     | 18                              | 0.48                            | 0.34–0.84                    | 1.6                      | 0.32                                                                        | 0.15 (0.11–0.27)                  |
|                                                | 151–210 m (15 years)         | 11                     | 5                               | 0.74                            | 0.69–2.16                    | 3.3                      | 0.20                                                                        | 0.15 (0.14–0.43)                  |
|                                                | 211–216 m (late adolescents) | 0                      | 0                               | -                               | -                            | -                        | 0.20                                                                        | -                                 |
| Angiography (excluding heart angio)            | 0–3 m (newborn)              | 9                      | 9                               | 1.37                            | 1.13–6.02                    | 19.7                     | NA                                                                          | -                                 |
|                                                | 4–30 m (1 year)              | 34                     | 21                              | 2.46                            | 0.67–3.80                    | 16.2                     | NA                                                                          | -                                 |
|                                                | 31–90 m (5 years)            | 18                     | 12                              | 8.23                            | 3.66–22.02                   | 15.0                     | NA                                                                          | -                                 |
|                                                | 91–150 m (10 years)          | 12                     | 4                               | 9.86                            | 2.92–26.22                   | 21.3                     | NA                                                                          | -                                 |
|                                                | 151–210 m (15 years)         | 22                     | 17                              | 16.73                           | 7.20–38.48                   | 15.2                     | NA                                                                          | -                                 |
|                                                | 211–216 m (late adolescents) | 0                      | 0                               | -                               | -                            | -                        | NA                                                                          | -                                 |

<sup>a</sup>Conversion factors from DAP to effective dose [27]. <sup>b</sup>Conversion factor for gastrointestinal track is the average of factors for stomach & duodenum and Oesophagus [27]

DAP dose area product, IQR interquartile range, m months, NA not available

**Table S2.4** Record of dose area product (DAP) values in noncardiac interventional procedures for the Health Effects of Cardiac Fluoroscopy and Modern Radiotherapy in Pediatrics (HARMONIC) cohort of Norwegian patients with congenital heart disease

| Exam                    | Age category                 | Number of examinations | Number of examinations with DAP | Median DAP (Gycm <sup>2</sup> ) | DAP IQR (Gycm <sup>2</sup> ) | Median fluoro time (min) | Conversion factor: effective dose/DAP (mSv/Gycm <sup>2</sup> ) |
|-------------------------|------------------------------|------------------------|---------------------------------|---------------------------------|------------------------------|--------------------------|----------------------------------------------------------------|
| Noncardiac Intervention | 0–3 m (newborn)              | 16                     | 7                               | 0.21                            | 0.08–4.2                     | 1.4                      | NA                                                             |
|                         | 4–30 m (1 year)              | 29                     | 18                              | 0.72                            | 0.21–3.19                    | 2.95                     | NA                                                             |
|                         | 31–90 m (5 years)            | 22                     | 12                              | 0.63                            | 0.41–11.16                   | 2.9                      | NA                                                             |
|                         | 91–150 m (10 years)          | 7                      | 5                               | 1.70                            | 0.09–11.55                   | 18.2                     | NA                                                             |
|                         | 151–210 m (15 years)         | 24                     | 16                              | 13.25                           | 2.19–27.85                   | 13                       | NA                                                             |
|                         | 211–216 m (late adolescents) | 1                      | 1                               | 40.19                           | -                            | 22.7                     | NA                                                             |

*DAP* dose area product, *IQR* interquartile range, *m* months, *NA* not available
